# Supplementary material for: Palladium Decorated N-Doped Carbon Foam as a Highly Active and Selective Catalyst for Nitrobenzene Hydrogenation
Source: MDPI journal article supplement (doi:10.3390/ijms23126423), 2022-06-08
Supplement: s1 [file s1]

## Supplementary Information

# Palladium Decorated N-doped Carbon Foam as Highly Active and Selective Catalyst for Nitrobenzene Hydrogenation

Ádám Prekob<sup>1,a</sup>, Ákos Szamosvölgyi<sup>2,b</sup>, Gábor Muránszky<sup>1,c</sup>, János Lakatos<sup>1,d</sup>, Zoltán Kónya<sup>2,e</sup>, Béla Fiser<sup>3,4,f</sup>, Béla Viskolcz<sup>1,g</sup> and László Vanyorek<sup>1,h,\*</sup>

<sup>1</sup>Institute of Chemistry, University of Miskolc, 3515 Miskolc-Egyetemváros, Hungary

<sup>2</sup>University of Szeged, Department of Applied and Environmental Chemistry, 6720 Szeged, Rerrich Béla tér 1. Hungary

<sup>3</sup>Higher Education and Industrial Cooperation Centre, University of Miskolc, 3515 Miskolc-Egyetemváros, Hungary

<sup>4</sup>Ferenc Rákóczi II. Transcarpathian Hungarian College of Higher Education, 90200 Beregszász, Transcarpathia, Ukraine

<sup>a</sup>kempadam@uni-miskolc.hu, <sup>b</sup>akos.szamosvolgyi@gmail.com, <sup>c</sup>kemmug@uni-miskolc.hu, <sup>d</sup>mtasotak@uni-miskolc.hu, <sup>e</sup>konya@chem.u-szeged.hu, <sup>f</sup>kemfiser@uni-miskolc.hu, <sup>g</sup>bela.viskolcz@uni-miskolc.hu, <sup>h</sup>kemvanyi@uni-miskolc.hu.

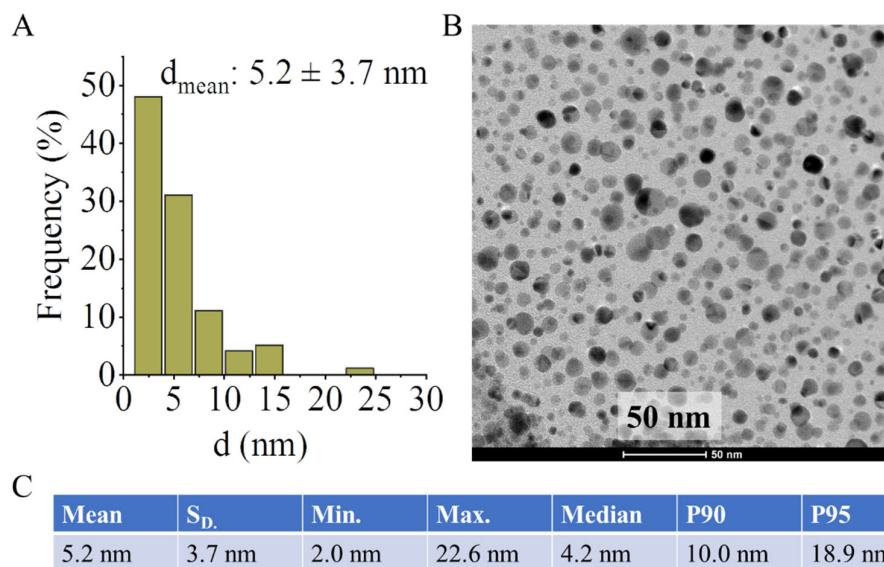

Figure S1. Size distribution (A), HRTEM image (B), and size distribution data (C) of the prepared palladium nanoparticles.

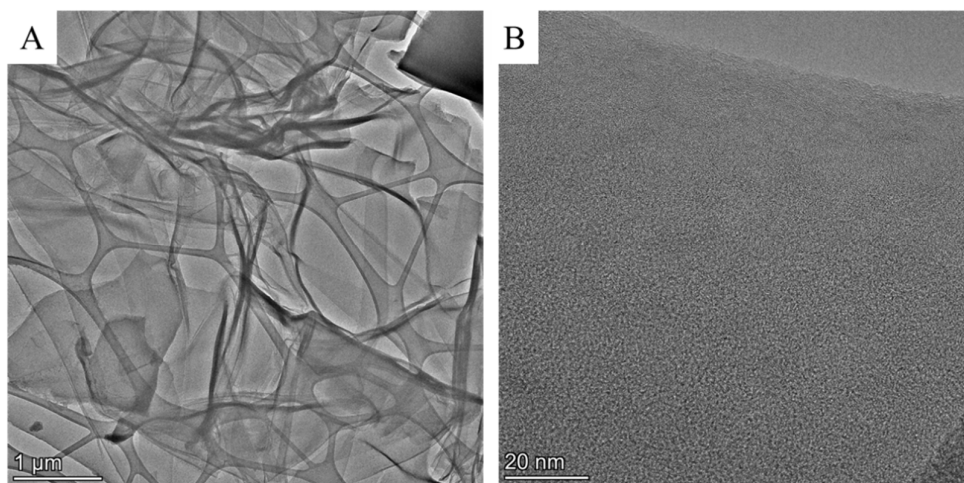

Figure S2. HRTEM images of the prepared carbon foils at different resolutions: 11 000x (A) and 500 000x (B)
